# Supplementary material for: Bamboo-structured N-doped CNTs/FeF3·0.33H2O derived from melamine as a high-performance cathode for Li-ion batteries
Source: Royal Society of Chemistry journal article supplement (doi:10.1039/d1nj02855c), 2021-01-01
Supplement: d1nj02855c1.pdf [file d1nj02855c1.pdf]

## Supplementary Information

### Bamboo-structured N-doped CNTs/FeF<sub>3</sub>·0.33H<sub>2</sub>O derived from melamine as a high-performance cathode for Li-ion batteries

Jing Ding, Xiangyang Zhou, Chucheng Luo, Juan Yang, Jingjing Tang\*

School of Metallurgy and Environment, Central South University, Changsha 410083, China

\*Corresponding author: Jingjing Tang

E-mail: [tangjj@csu.edu.cn](mailto:tangjj@csu.edu.cn)

Phone: +86-731-88836329; Fax: +86-731-88871017

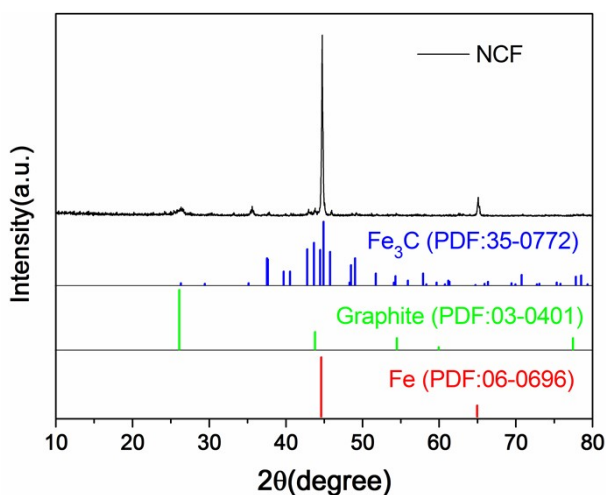

Fig. S1. XRD pattern of NCF

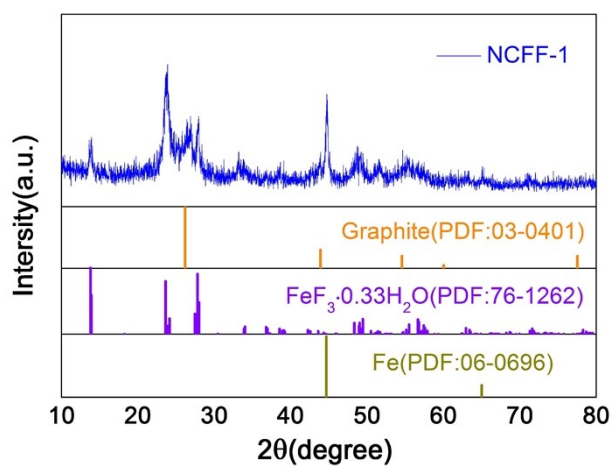

**Fig. S2** XRD pattern of NCF-1

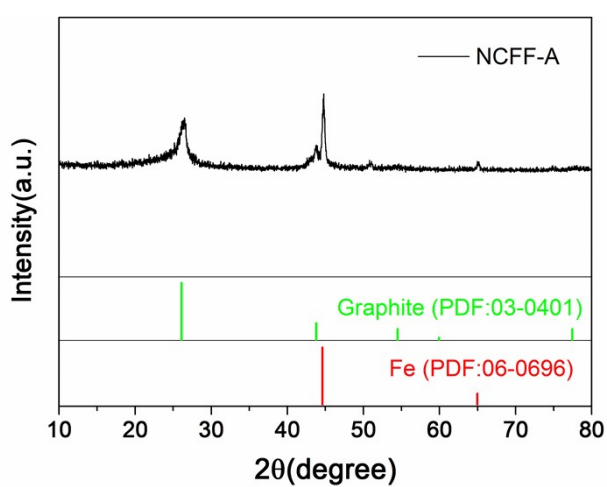

**Fig. S3.** XRD pattern of NCF-1-A

The NCF sample was washed by dilute nitric acid to remove the  $\text{FeF}_3 \cdot 0.33\text{H}_2\text{O}$  and the NCF-1-A was obtained. It can be found that the diffraction peaks of the NCF-1-A are similar to NCF, which is composed of CNTs and Fe.

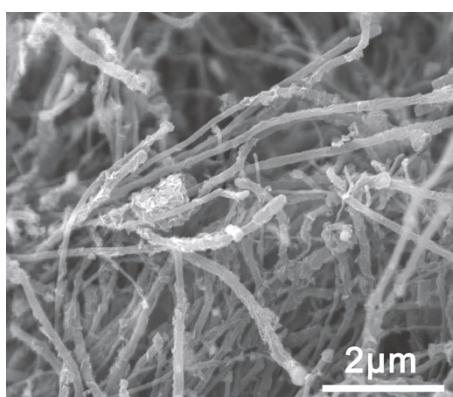

**Fig. S4.** SEM image of NCF.

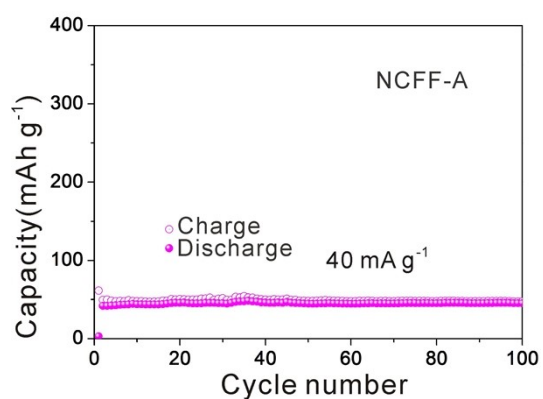

**Fig. S5.** Cycling performance of NCFE-A

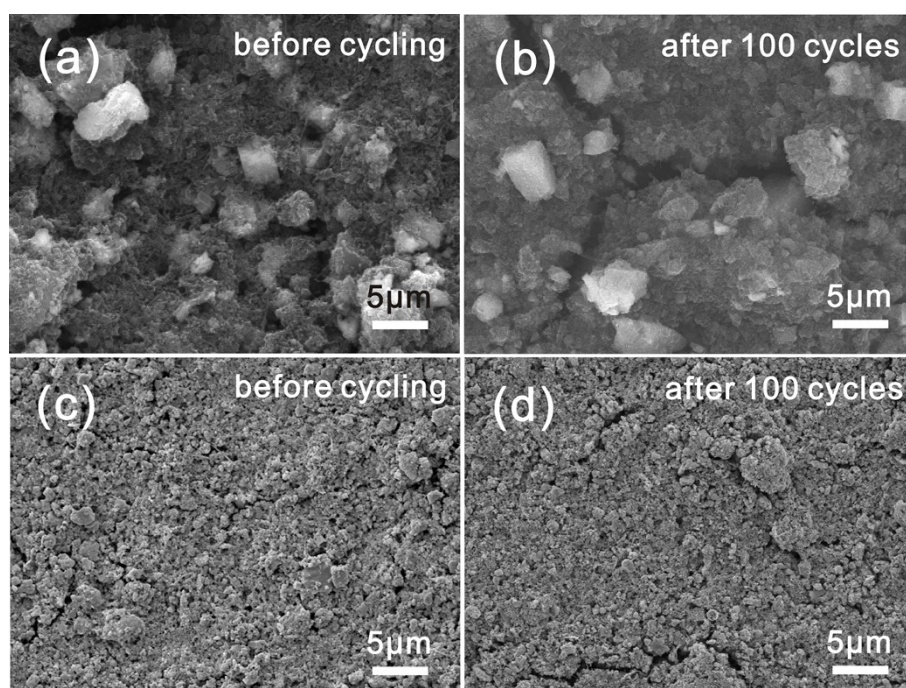

**Fig. S6.** SEM images of NCFE-1 (a, b) and NCFE (c, d) electrodes surface before cycling and after 100 cycles at 40 mA g<sup>-1</sup>.

Compared with the NCFE-1 electrode, it can be observed that NCFE electrode has no obvious change after 100 cycles in comparison with fresh electrode, indicating that the structural stability can be maintained by vapor-solid fluoridation.

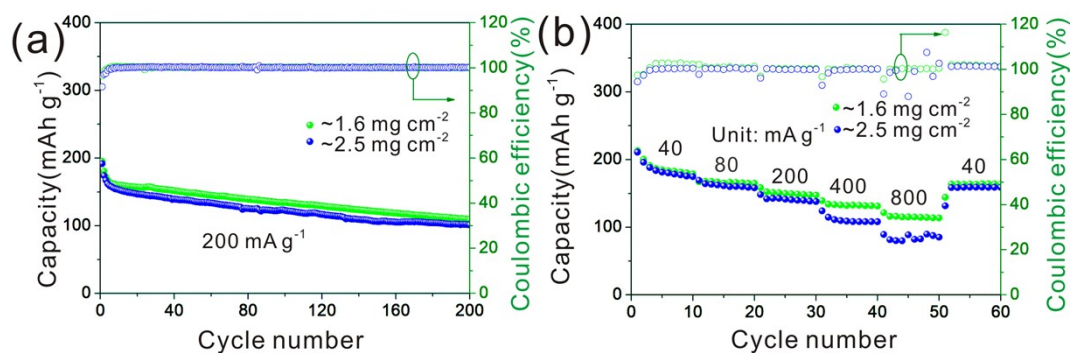

**Fig. S7.** Cycling performances and rate performances of NCF for different mass loading.

**Table S1.** Comparison of electrochemical parameters for  $\text{FeF}_3 \cdot 0.33\text{H}_2\text{O}$  cathode materials reported in the literatures and this work

| Sample                                                           | Current density( $\text{mA g}^{-1}$ ) | Voltage range(V) | Cycle No. | Discharge capacity( $\text{mAh g}^{-1}$ ) | Ref.      |
|------------------------------------------------------------------|---------------------------------------|------------------|-----------|-------------------------------------------|-----------|
| $\text{FeF}_3 \cdot 0.33\text{H}_2\text{O}$ /porous graphene/CNT | 200                                   | 1.7-4.5          | 100       | 120                                       | [1]       |
| $\text{FeF}_3 \cdot 0.33\text{H}_2\text{O}$ /G/CNT               | 47.4                                  | 1.8-4.5          | 50        | 193.1                                     | [2]       |
| $\text{FeF}_3 \cdot 0.33\text{H}_2\text{O}$ nanosheet/GQDs       | 400                                   | 1.7-4.5          | 1000      | 96                                        | [3]       |
| $\text{FeF}_3 \cdot 0.33\text{H}_2\text{O}$ @3D porous carbon    | 200                                   | 2.0-4.5          | 200       | 148.3                                     | [4]       |
| $\text{FeF}_3 \cdot 0.33\text{H}_2\text{O}$ /porous carbon       | 200                                   | 1.7-4.5          | 50        | 162                                       | [5]       |
| $\text{FeF}_3 \cdot 0.33\text{H}_2\text{O}$ /SP single crystal   | 20                                    | 2.0-4.5          | 100       | 167                                       | [6]       |
| $\text{FeF}_3 \cdot 0.33\text{H}_2\text{O}$ /rGO                 | 100                                   | 1.7-4.5          | 100       | 175                                       | [7]       |
| $\text{FeF}_3 \cdot 0.33\text{H}_2\text{O}$ /Ag/SP               | 23.7                                  | 2.0-4.5          | 50        | 128.4                                     | [8]       |
| $\text{FeF}_3 \cdot 0.33\text{H}_2\text{O}$ @CNHs                | 200                                   | 1.7-4.5          | 50        | 154                                       | [9]       |
| $\text{FeF}_3 \cdot 0.33\text{H}_2\text{O}$ /MCNTs               | 20                                    | 2.0-4.3          | 50        | 90.5                                      | [10]      |
| NCF                                                              | 40                                    | 2.0-4.5          | 100       | 160.7                                     | This work |

## References

- 1 Q. Zhang, Y. Zhang, Y. Yin, L. Fan and N. Zhang, *J. Power Sources*, 2020, **447**, 227303.
- 2 L. Lu, S. Li, J. Li, L. Lan, Y. Lu, S. Xu, S. Huang, C. Pan and F. Zhao, *Nanoscale Res. Lett.*, 2019, **14**, 100.
- 3 Q. Zhang, C. Sun, L. Fan, N. Zhang and K. Sun, *Chem. Eng. J.*, 2019, **371**, 245-251.

- 4 Q. Zhang, X. Wu, S. Gong, L. Fan and N. Zhang, *ChemistrySelect*, 2019, **4**, 10334-10339.
- 5 Q. Zhang, N. N. Liu, C. Z. Sun, L. S. Fan, N. Q. Zhang and K. N. Sun, *ChemElectroChem*, 2019, **6**, 2189-2194.
- 6 G. Chen, X. Zhou, Y. Bai, Y. Yuan, Y. Li, M. Chen, L. Ma, G. Tan, J. Hu, Z. Wang, F. Wu, C. Wu and J. Lu, *Nano Energy*, 2019, **56**, 884-892.
- 7 J. Zhai, Z. Lei, D. Rooney and K. Sun, *Electrochim. Acta*, 2019, **313**, 497-504.
- 8 Y. Li, X. Zhou, Y. Bai, G. Chen, Z. Wang, H. Li, F. Wu and C. Wu, *Acs Appl. Mater. Inter.*, 2017, **9**, 19852-19860.
- 9 L. Fan, B. Li, N. Zhang and K. Sun, *Sci. Rep.*, 2015, **5**, 12154.
- 10 Y. Zhang, L. Wang, J. Li, X. He, L. Wen, J. Gao, H. Liu, Y. Zhang and P. Zhao, *J. New Mater. Electrochem. Sys.*, 2015, **18**, 103-109.
